# Supplementary material for: On the Difference in Quality between Current Heuristic and Optimal Solutions to the Protein Structure Alignment Problem
Source: Hindawi journal article supplement (doi:10.1155/2013/459248), 2012-12-27
Supplement: f1 [file 459248.f1.pdf]

## FSSP Benchmark

| <b>Structure pair</b> | <b>Length 1</b> | <b>Length 2</b> |
|-----------------------|-----------------|-----------------|
| <b>Family</b>         |                 |                 |
| 1bdo_1ghj             | 80              | 79              |
| 1d3bA_1d3bB           | 72              | 81              |
| 1aly_1c28A            | 146             | 125             |
| 1dt4A_1vih            | 73              | 71              |
| 1agdB_1cqkA           | 99              | 101             |
| 1ayoA_1aohA           | 130             | 143             |
| 1dynA_1evhA           | 113             | 111             |
| 1b20A_1rgeA           | 109             | 96              |
| 1smtA_1qbjA           | 98              | 65              |
| 2vhbA_1ash            | 137             | 147             |
| 1rlw_1bdyA            | 126             | 123             |
| 2hddA_1akhA           | 55              | 49              |
| 1lfdA_1vcbA           | 87              | 98              |
| 1r69_1b0nA            | 63              | 103             |
| 1stmA_1a34A           | 141             | 147             |
| 1aba_1kte             | 87              | 105             |
| 1dz3A_1dcfA           | 123             | 133             |
| 1d4tA_1qadA           | 104             | 104             |
| 1onc_7rsa             | 103             | 124             |
| 2irfG_1awcA           | 109             | 110             |
| 1ghqB_1cklB           | 129             | 126             |
| 1jrhI_1ten            | 95              | 89              |
| 1vpfA_1pdgA           | 94              | 87              |
| 1fit_1kpf             | 124             | 111             |
| 1lis_1gakA            | 131             | 137             |
| 1b6e_1ixxB            | 121             | 123             |
| 1kwaA_1pdr            | 88              | 96              |
| 1eteA_1hmcB           | 134             | 143             |
| 2u2fA_1h6kZ           | 85              | 78              |
| 1ifqA_1h8mA           | 124             | 140             |
| 2bopA_1f9fA           | 85              | 76              |
| 256bA_2ccyA           | 106             | 127             |
| 1tiiD_1bcpD           | 98              | 110             |
| 1rie_1rfs             | 127             | 127             |
| 2dhqA_1di0A           | 136             | 148             |
| 1cy5A_3ygsP           | 92              | 97              |
| 1fxkA_1fxkC           | 103             | 133             |
| 1jfiB_1aoiB           | 135             | 83              |
| 1ax8_1cnt3            | 130             | 146             |
| 1ibzA_2cuaA           | 111             | 122             |
| 1jb0C_1xer            | 80              | 102             |
| 1quqB_1quqA           | 114             | 121             |
| 1gcpA_1bbzA           | 65              | 58              |
| 1bh9B_1aoiA           | 89              | 98              |
| 1vls_1nfn             | 146             | 132             |
| 1aqzA_9rnt            | 142             | 104             |
| 1b9IA_1dhn            | 119             | 121             |
| 1f5wA_1tlk            | 124             | 103             |
| 3inkC_1rcb            | 121             | 129             |

## FSSP Benchmark

|             |     |     |
|-------------|-----|-----|
| 1otgA_1dptA | 125 | 117 |
| 1qgvA_1erv  | 130 | 105 |
| 1dwnA_1msc  | 127 | 129 |
| 1shsA_1ejfA | 115 | 110 |
| 1vcbB_1buoA | 88  | 121 |
| 1opy_1jn5A  | 123 | 136 |

### Superfamily

|             |     |     |
|-------------|-----|-----|
| 1ag4_1f53A  | 103 | 84  |
| 1bdo_1htp   | 80  | 131 |
| 1a75A_1psrA | 106 | 100 |
| 1stmA_1cwpA | 141 | 149 |
| 1wdcA_1sfcC | 64  | 77  |
| 1mjhA_1cozA | 143 | 126 |
| 1an2A_1am9A | 86  | 80  |
| 1b0nA_1lmb3 | 103 | 87  |
| 1qgvA_1ewxA | 130 | 144 |
| 4hb1_1a32   | 44  | 85  |
| 1e2aA_1fzcA | 102 | 74  |
| 1b20A_9rnt  | 109 | 104 |
| 1he1A_1nfn  | 135 | 132 |
| 1hcnB_1agqA | 110 | 91  |
| 1x11A_1evhA | 126 | 111 |
| 1d66A_1zmeC | 57  | 70  |
| 1t1dA_1buoA | 100 | 121 |
| 1akhA_1tc3C | 49  | 51  |
| 1ytfC_1ytfD | 46  | 100 |
| 1bkb_1mjc   | 132 | 69  |
| 1g3fA_1c9qA | 117 | 117 |
| 1exg_1ayoA  | 110 | 130 |
| 2chsA_1qu9A | 114 | 126 |
| 1pi2_1c2aA  | 61  | 120 |
| 1dulA_1qb2A | 61  | 106 |
| 1b3aA_1a15A | 67  | 67  |
| 1ptf_1ctf   | 87  | 68  |
| 1dptA_1otfA | 117 | 59  |
| 1mof_1fzgD  | 53  | 54  |
| 1jc7A_1krs  | 129 | 110 |
| 1aoiA_1a7w  | 98  | 68  |
| 1awcA_2hts  | 110 | 88  |
| 2pkaA_2hrvA | 80  | 139 |
| 1c28A_1sfp  | 125 | 111 |
| 1tgsI_1tbrR | 56  | 103 |
| 1ptq_1far   | 50  | 52  |
| 1dupA_1tul  | 136 | 102 |
| 1ckIB_1hfh  | 126 | 120 |
| 1jhgA_2ezk  | 101 | 93  |
| 1f3uA_1f3uB | 118 | 139 |
| 1pfsA_1gvp  | 78  | 87  |
| 1tocR_1bpi  | 120 | 58  |
| 1bylA_1jc4A | 122 | 139 |

## FSSP Benchmark

|             |     |     |
|-------------|-----|-----|
| 2drpA_1aayA | 63  | 85  |
| 1tpg_1fbr   | 91  | 93  |
| 1cof_1svy   | 135 | 101 |
| 1emn_1dx5I  | 82  | 118 |
| 1chc_1rmd   | 68  | 116 |
| 1kum_1vcbC  | 108 | 142 |
| 1bbzA_1tud  | 58  | 60  |
| 1jb0C_1a6I  | 80  | 106 |
| 1vsrA_1gefA | 134 | 120 |
| 3caoA_3cyr  | 102 | 107 |
| 1hulA_1d9cA | 108 | 121 |
| 1hyp_1bea   | 75  | 116 |
| 1cdzA_1imoA | 96  | 88  |
| 1jpyB_1bndA | 121 | 109 |
| 1jrhl_1do6A | 95  | 124 |
| 1lea_1smtA  | 72  | 98  |
| 1a8o_1ak4C  | 66  | 145 |
| 1ekrA_1cc8A | 143 | 72  |
| 1eo6A_1vcbA | 116 | 98  |
| 1fseA_1fc3A | 67  | 119 |
| 1cy5A_1ddf  | 92  | 127 |
| 2dhqA_1be1  | 136 | 137 |
| 1bazA_2cpgA | 49  | 43  |
| 1dhn_1b66A  | 121 | 138 |
| 1hryA_1cktA | 73  | 71  |

### Fold

|             |     |     |
|-------------|-----|-----|
| 1rss_1tfe   | 140 | 142 |
| 1kp6A_1jidA | 79  | 114 |
| 2ezh_1fseA  | 65  | 67  |
| 1awd_2igd   | 94  | 61  |
| 1qj8A_1dwnA | 148 | 127 |
| 1g8eA_1jb0F | 98  | 141 |
| 1bgf_1ytfB  | 124 | 46  |
| 1ctf_1vih   | 68  | 71  |
| 1rzi_1bea   | 91  | 116 |
| 1ahsA_1sfp  | 126 | 111 |
| 1i0uA_1dx5I | 82  | 118 |
| 1diiC_1dw0A | 73  | 112 |
| 1skz_1ejaB  | 104 | 53  |
| 1cei_1g8qA  | 85  | 90  |
| 1utg_1qc7A  | 70  | 101 |
| 1b33N_1jb0D | 67  | 138 |
| 1rhoA_1jrhl | 142 | 95  |
| 1i8nA_5hpgA | 89  | 84  |
| 1pi2_1bi6H  | 61  | 41  |
| 1a02F_1g2cB | 53  | 40  |
| 1cli_1j7rA  | 144 | 77  |
| 1ecmA_2vhbA | 91  | 137 |
| 1ubpB_1c5eA | 122 | 95  |
| 1hcrA_1akhA | 52  | 49  |

## FSSP Benchmark

|             |     |     |
|-------------|-----|-----|
| 1f08A_8atcB | 148 | 146 |
| 1zeiA_1bg8A | 53  | 76  |
| 1lywA_1b5fB | 95  | 87  |
| 1bpi_1kigl  | 58  | 60  |
| 2gcc_2bb8   | 63  | 71  |
| 1i2tA_1guxB | 61  | 141 |
| 1seiA_1tig  | 130 | 88  |
| 1esxA_1jb0J | 96  | 41  |
| 1fc2C_2gp8A | 43  | 40  |
| 2a3dA_1dvkA | 73  | 149 |
| 1smpI_1hmt  | 100 | 131 |
| 1azpA_1a15A | 66  | 67  |
| 1ag4_1wapA  | 103 | 68  |
| 1isuA_1ckuA | 62  | 85  |
| 1cmbA_1bazA | 104 | 49  |
| 1a1x_1dtvA  | 106 | 67  |
| 1hymA_2snil | 44  | 64  |
| 1f37A_1aba  | 109 | 87  |
| 1tuc_1ihvA  | 61  | 52  |
| 1jpyB_2tgi  | 121 | 112 |
| 1ucyE_2hrvA | 109 | 139 |
| 1an4A_1a0aA | 65  | 63  |
| 1ifqA_1pne  | 124 | 139 |
| 1jy2O_1jy2N | 51  | 43  |
| 1r1bA_1hp8  | 56  | 68  |
| 1opy_1cewl  | 123 | 108 |
| 1g6uA_1be3H | 48  | 64  |
| 1d3bA_1ytfC | 72  | 46  |
| 2alcA_1d66A | 65  | 57  |
| 1eduA_1hxiA | 143 | 108 |
| 2occK_1ltaC | 49  | 45  |
| 2occJ_2occl | 58  | 47  |
| 1ubpA_1cmiA | 99  | 85  |
| 1pru_1uxc   | 56  | 50  |
| 1poc_1poa   | 134 | 118 |
| 1b93A_1pauA | 148 | 140 |
